# Supplementary material for: Single-cell Analysis of CAR-T Cell Activation Reveals A Mixed TH1/TH2 Response Independent of Differentiation
Source: PubMed Central journal article supplement — Genomics Proteomics Bioinformatics. 2019 Jun 20;17(2):129–39. doi: 10.1016/j.gpb.2019.03.002 (PMC6620429; doi:10.1016/j.gpb.2019.03.002), 2019-06-20

**A** Target (Raji) : Effector (CAR-T) cell co-incubation in microchambers

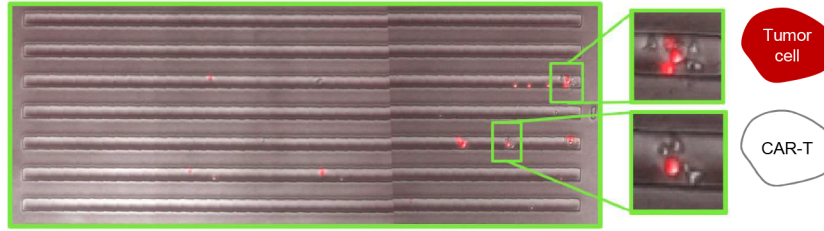

**B** Fluorescent signal representing proteins secreted and detected

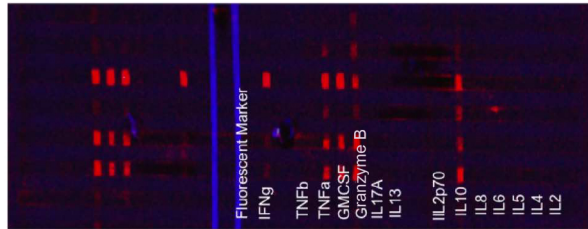

**C** Image overlay

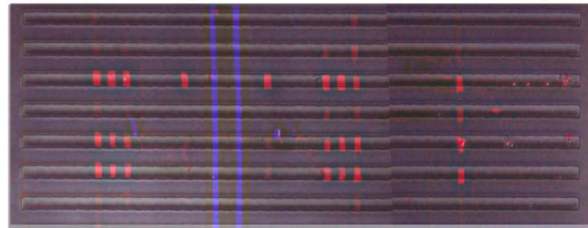

Supplement: mmc5.pdf [file mmc5.pdf]
