# Supplementary material for: Single-cell Analysis of CAR-T Cell Activation Reveals A Mixed TH1/TH2 Response Independent of Differentiation
Source: PubMed Central journal article supplement — Genomics Proteomics Bioinformatics. 2019 Jun 20;17(2):129–39. doi: 10.1016/j.gpb.2019.03.002 (PMC6620429; doi:10.1016/j.gpb.2019.03.002), 2019-06-20

A

Gene sets enriched in phenotype

|   | GS<br>follow link to MSigDB                                | GS DETAILS                 | SIZE | ES    | NES   | NOM p-val | FDR q-val | FWER p-val | RANK AT MAX | LEADING EDGE                  |
|---|------------------------------------------------------------|----------------------------|------|-------|-------|-----------|-----------|------------|-------------|-------------------------------|
| 1 | <a href="#">HALLMARK_TNFA_SIGNALING_VIA_NFKB</a>           | <a href="#">Details...</a> | 183  | -0.52 | -1.90 | 0.000     | 0.002     | 0.004      | 1506        | tags=46%, list=9%, signal=51% |
| 2 | <a href="#">HALLMARK_EPITHELIAL_MESENCHYMAL_TRANSITION</a> | <a href="#">Details...</a> | 125  | -0.31 | -1.38 | 0.045     | 0.228     | 0.471      | 1008        | tags=20%, list=6%, signal=21% |
| 3 | <a href="#">HALLMARK_IL6_JAK_STAT3_SIGNALING</a>           | <a href="#">Details...</a> | 71   | -0.37 | -1.29 | 0.151     | 0.262     | 0.586      | 1139        | tags=35%, list=7%, signal=38% |
| 4 | <a href="#">HALLMARK_KRAS_SIGNALING_DN</a>                 | <a href="#">Details...</a> | 83   | -0.30 | -1.25 | 0.114     | 0.244     | 0.631      | 1156        | tags=17%, list=7%, signal=18% |
| 5 | <a href="#">HALLMARK_INFLAMMATORY_RESPONSE</a>             | <a href="#">Details...</a> | 147  | -0.31 | -1.21 | 0.178     | 0.232     | 0.677      | 941         | tags=27%, list=6%, signal=29% |
| 6 | <a href="#">HALLMARK_IL2_STAT5_SIGNALING</a>               | <a href="#">Details...</a> | 185  | -0.29 | -1.07 | 0.351     | 0.360     | 0.806      | 954         | tags=26%, list=6%, signal=27% |
| 7 | <a href="#">HALLMARK_INTERFERON_GAMMA_RESPONSE</a>         | <a href="#">Details...</a> | 182  | -0.29 | -0.99 | 0.484     | 0.418     | 0.862      | 1139        | tags=32%, list=7%, signal=34% |
| 8 | <a href="#">HALLMARK_KRAS_SIGNALING_UP</a>                 | <a href="#">Details...</a> | 142  | -0.24 | -0.98 | 0.470     | 0.378     | 0.869      | 979         | tags=20%, list=6%, signal=21% |

B

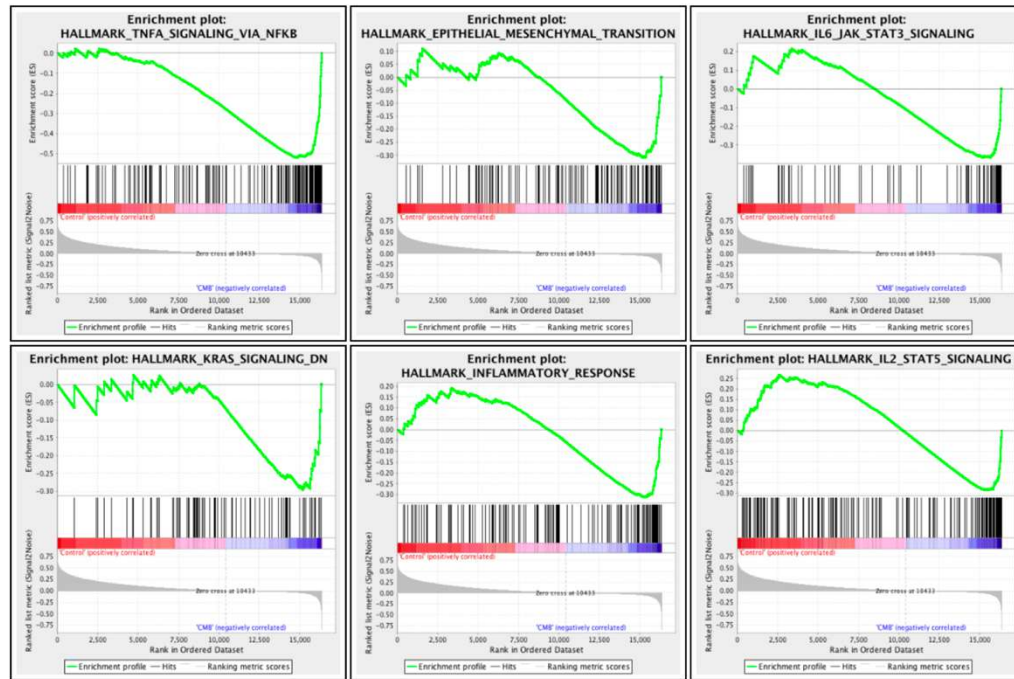

Supplement: mmc7.pdf [file mmc7.pdf]
