# Supplementary figures and images for: Single-cell Analysis of CAR-T Cell Activation Reveals A Mixed TH1/TH2 Response Independent of Differentiation
Source: PubMed Central journal article supplement — Genomics Proteomics Bioinformatics. 2019 Jun 20;17(2):129–39. doi: 10.1016/j.gpb.2019.03.002 (PMC6620429; doi:10.1016/j.gpb.2019.03.002), 2019-06-20

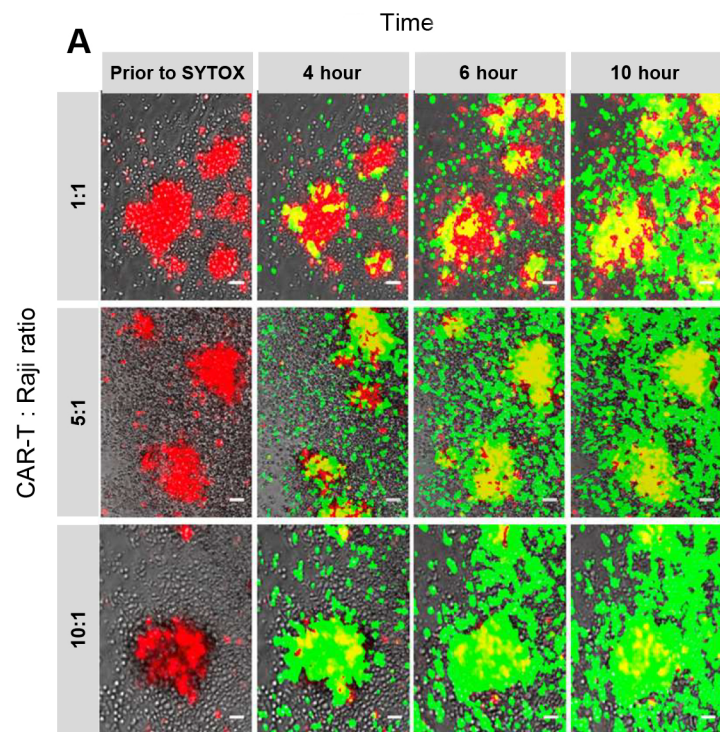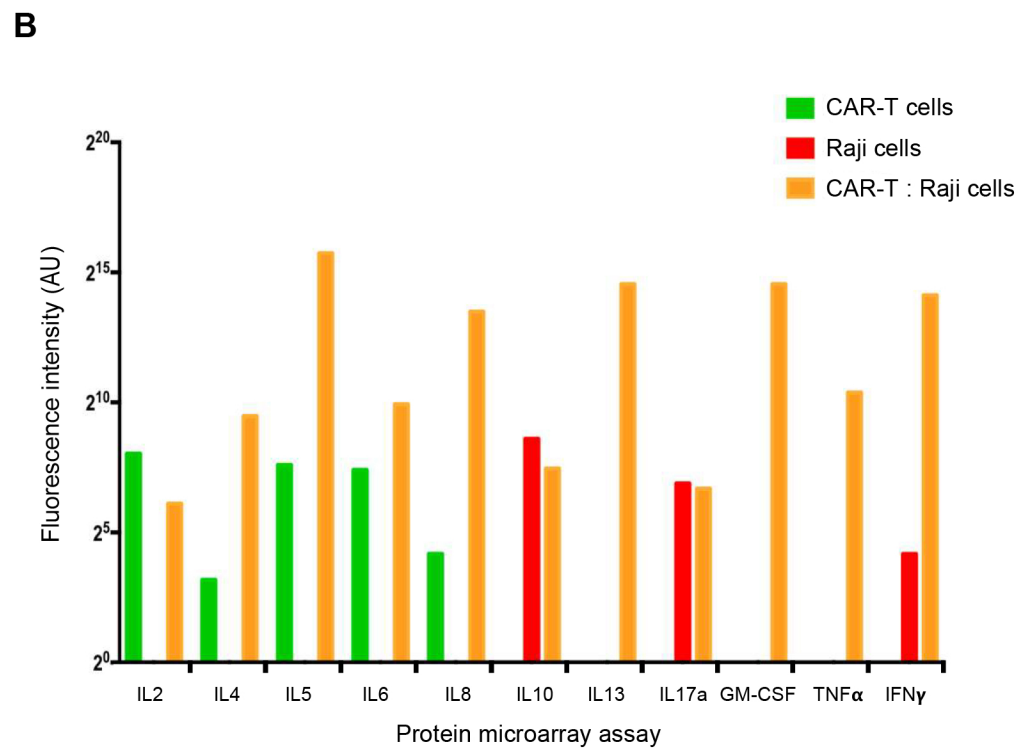

Supplement: mmc1.pdf [file mmc1.pdf]

**A**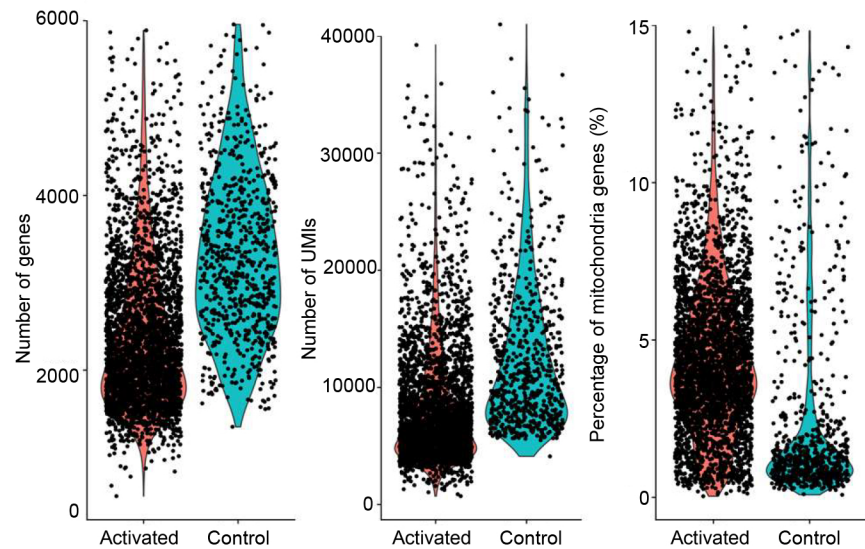**C**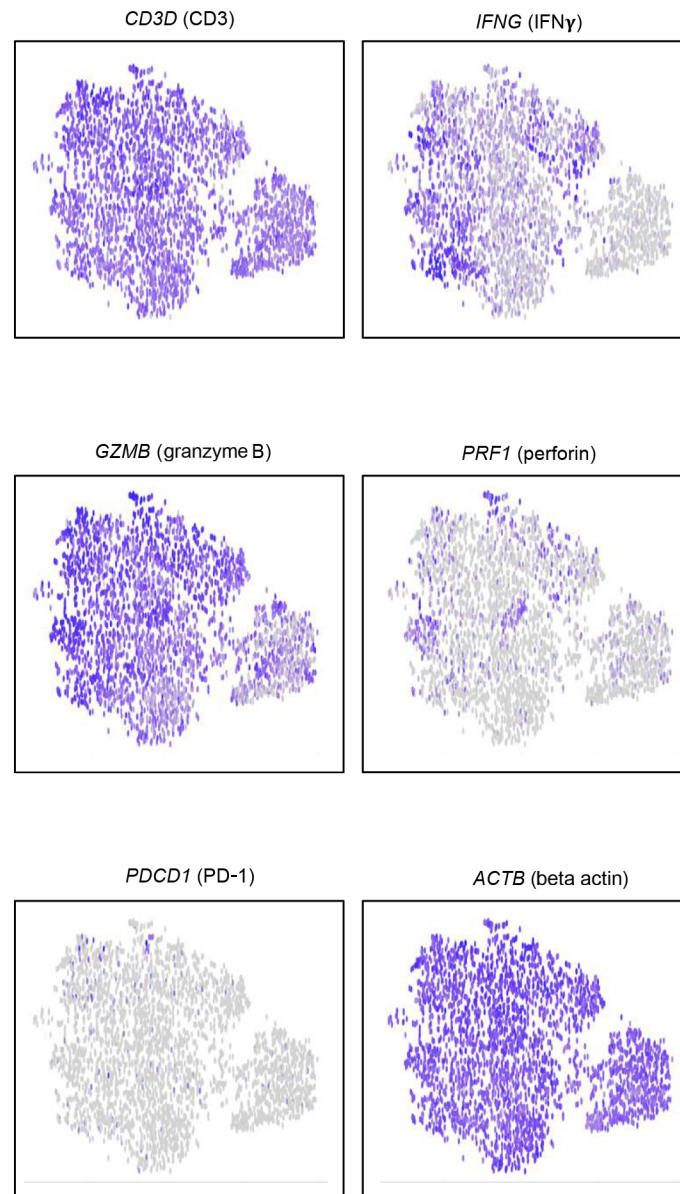**B**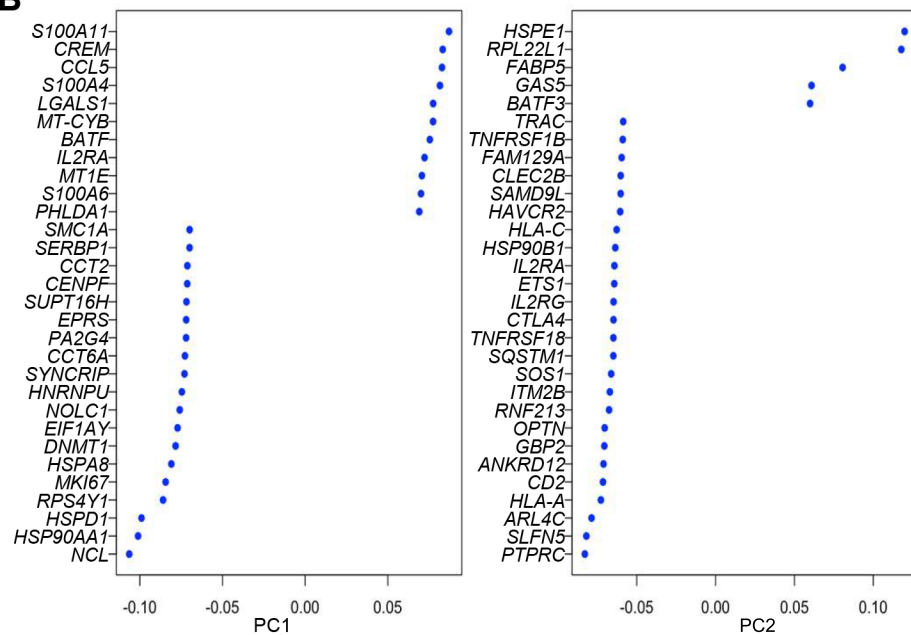

Supplement: mmc2.pdf [file mmc2.pdf]

**A**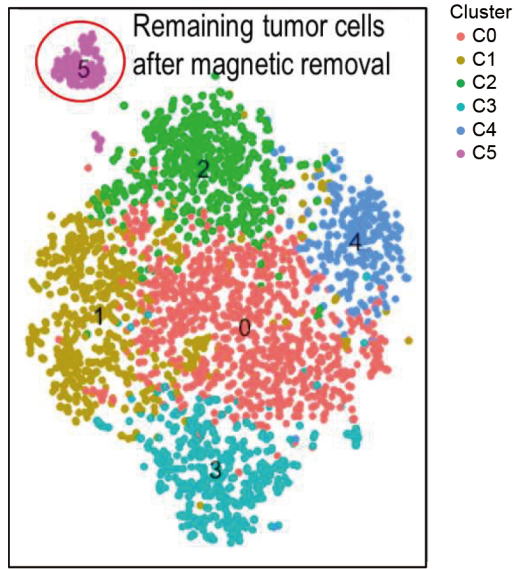**B**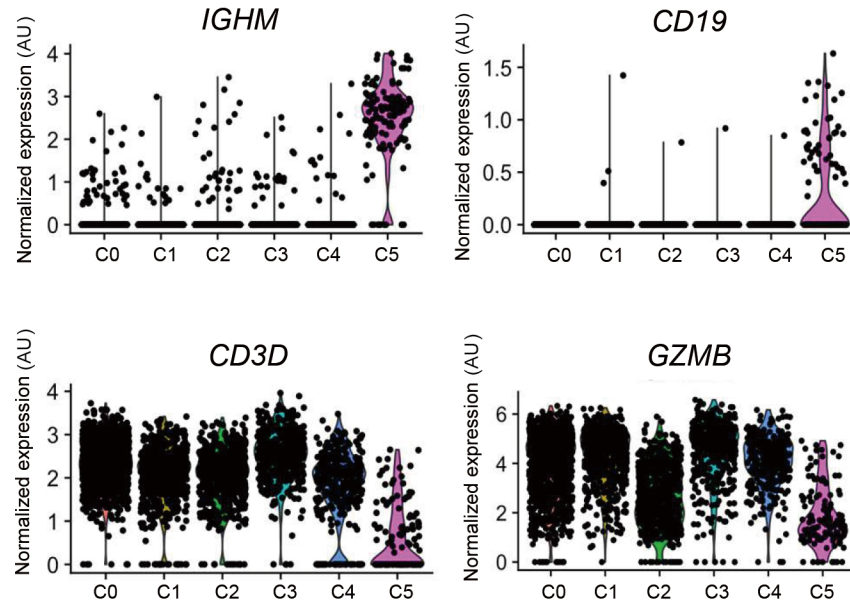

Supplement: mmc3.pdf [file mmc3.pdf]

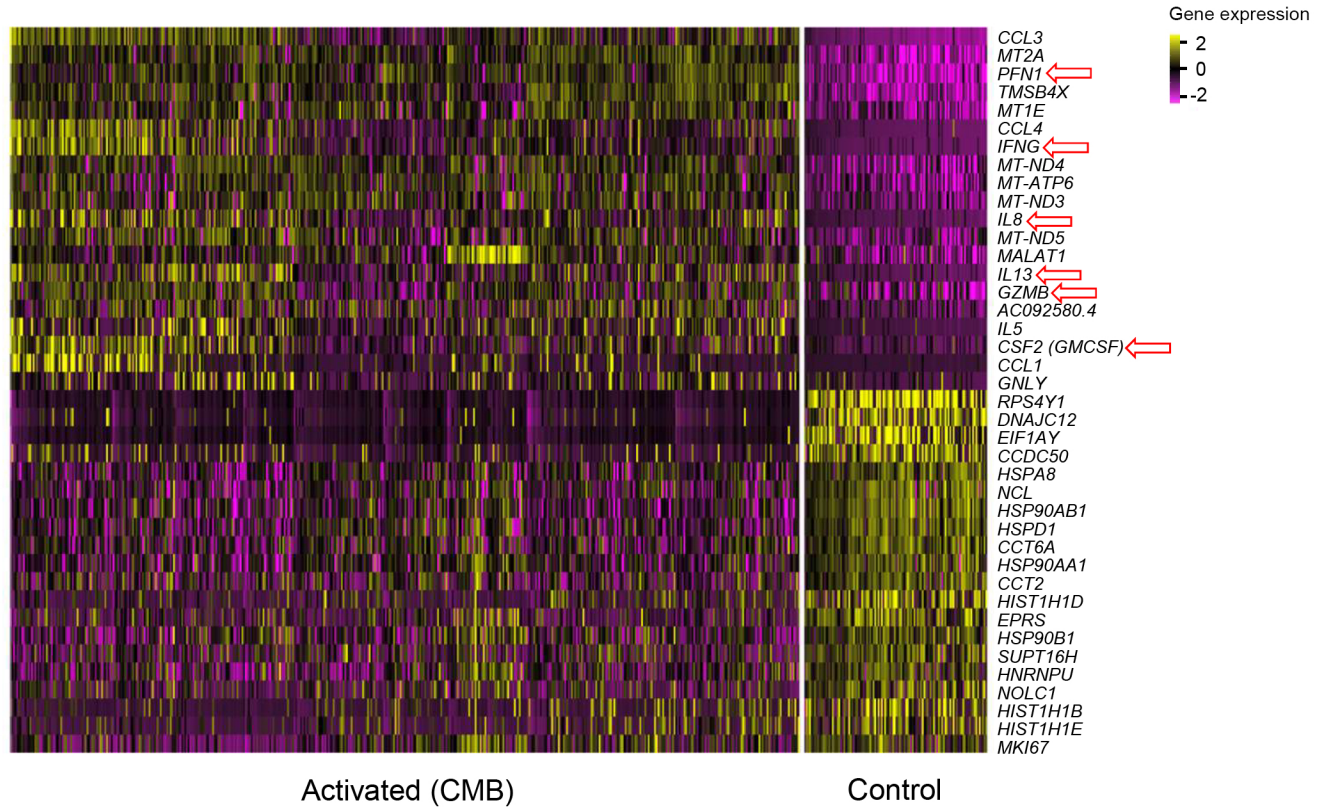

Supplement: mmc4.pdf [file mmc4.pdf]

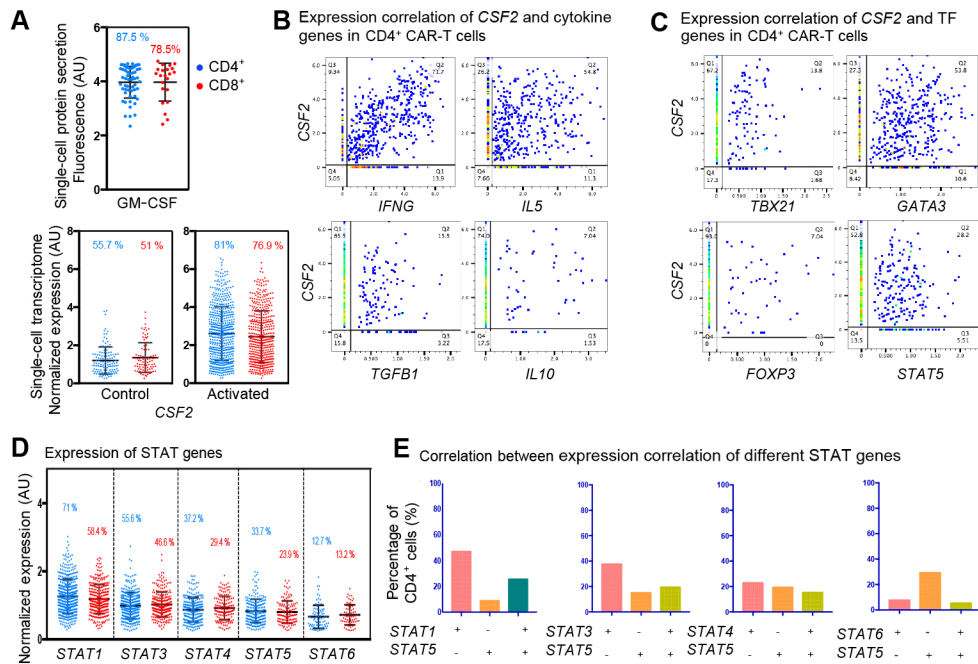

Supplement: mmc6.pdf [file mmc6.pdf]

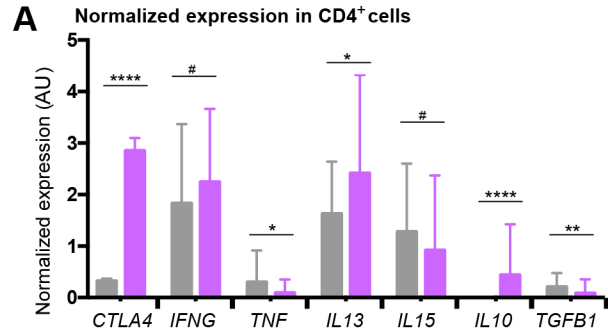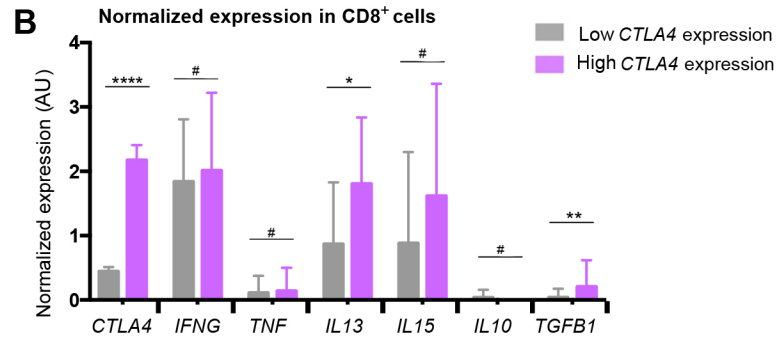

Supplement: mmc8.pdf [file mmc8.pdf]
